1 **Evidence for rapid evolution in a grassland biodiversity experiment**

2

3 Sofia J. van Moorsel\*<sup>1,6</sup>, Marc W. Schmid\*<sup>1,2,6</sup>, Niels C.A.M. Wagemaker<sup>3</sup>, Thomas  
4 van Gulp<sup>4</sup>, Bernhard Schmid<sup>1</sup> and Philippine Vergeer<sup>3,5,6</sup>

5

6 \*Equal contribution

7

8 <sup>1</sup>Department of Evolutionary Biology and Environmental Sciences, University of  
9 Zürich, Winterthurerstrasse 190, CH-8057, Switzerland

10 <sup>2</sup>MWSchmid GmbH, Möhrlistrasse 25, CH-8006 Zürich

11 <sup>3</sup>Institute for Water and Wetland Research, Radboud University Nijmegen,  
12 Heyendaalseweg 135, NL-6500 GL Nijmegen

13 <sup>4</sup>Deena Bioinformatics, Haverlanden 237, NL-6708 GL Wageningen

14 <sup>5</sup>Department of Environmental Sciences, Plant Ecology and Nature Conservation  
15 group, Wageningen University, Droevendaalsesteeg 3, NL-6708 PB Wageningen

16

17 <sup>6</sup> Authors for correspondence:

18 Sofia J. van Moorsel, [sofia.vanmoorsel@ieu.uzh.ch](mailto:sofia.vanmoorsel@ieu.uzh.ch)

19 Marc W. Schmid, [contact@mwschmid.ch](mailto:contact@mwschmid.ch)

20 Philippine Vergeer, [philippine.vergeer@wur.nl](mailto:philippine.vergeer@wur.nl)

21

22

## 23 **Summary**

- 24 • In long-term grassland biodiversity experiments positive effects of biodiversity on  
25 plant productivity commonly increase with time. Previously it was shown that  
26 differential selection in monoculture and mixed-species grassland communities  
27 could lead to the rapid emergence of monoculture and mixture phenotypes.  
28 Underlying mechanisms for such rapid phenotypic responses are however still  
29 unclear.
- 30 • We hypothesized that in biodiversity experiments pre-adapted genotypes or  
31 epigenetic variants could be sorted out from the standing genetic or epigenetic  
32 variation.
- 33 • To test if biodiversity acted as a selective environment, we grew offspring from  
34 plants that were exposed for twelve years to a monoculture or mixture environment  
35 in a biodiversity experiment (Jena Experiment) under controlled greenhouse  
36 conditions. Using epiGBS, a genotyping-by-sequencing approach combined with  
37 bisulfite conversion to provide integrative genetic and epigenetic data, we showed  
38 that plants with a monoculture or mixture background were genetically distinct.
- 39 • Our data reveal strong genetic and epigenetic divergence within species according  
40 to selection history and suggest variation in epigenetic variation to be largely under  
41 genetic control. This pattern was consistently observed across six perennial  
42 grassland species. Our results suggest that selection of genetic variants caused the  
43 rapid emergence of monoculture and mixture types in the Jena Experiment.

44

45 **Key words:** biodiversity, epiGBS, epigenetic variation, genetic divergence,  
46 herbaceous plant species

47

## 48 **Introduction**

49 The Earth's biosphere is currently challenged by the impacts of anthropogenic  
50 environmental change and plant populations may encounter new abiotic or biotic  
51 environment due to climate-induced range shifts (Ouborg *et al.*, 2006). The  
52 unprecedented rate of environmental change raises the question whether natural  
53 communities can adapt fast enough to novel abiotic or biotic conditions. Biodiversity  
54 has been shown to buffer ecosystem towards climatic extremes and novel  
55 environmental conditions (Isbell *et al.*, 2015) and in addition it was shown that co-  
56 evolution among plants comprising a community could buffer the impact of an  
57 extreme climatic event (van Moorsel *et al.*, 2018a).

58 Adaptive responses of plant populations to environmental factors (e.g., Schmid  
59 1985; Joshi *et al.*, 2001) and biotic interactions (Gervasi & Schiestl 2017) are well  
60 studied, but little effort has been devoted to studying the influence of community  
61 diversity on population structure and productivity (but see Lipowsky *et al.*, 2011;  
62 Kleynhans *et al.*, 2016). In particular, the influence of multi-species interactions for  
63 the adaptive response of a species is largely unknown, despite a growing body of  
64 evidence pointing towards the importance of species-interaction networks for the  
65 maintenance of ecosystem stability (Bastolla *et al.*, 2009). It is conceivable that the  
66 feedback between species interactions and their adaptive responses shapes  
67 community-level ecosystem functioning (van Moorsel *et al.*, 2018).

68 In the 1960s it was proposed that there are large differences in the time scales  
69 between ecological and evolutionary processes (Slobodkin 1961), but now it is well  
70 known that micro-evolutionary and ecological processes can occur on the same  
71 temporal scale (reviewed by Hairston *et al.*, 2005; Schoener 2011). Thus, it appears  
72 that micro-evolutionary processes may allow for an evolutionary rescue in a rapidly  
73 changing environment. However, evidence of genetic adaptation to mild stresses in  
74 natural situations over short time scales of a few generations is still scarce.  
75 Understanding how biodiversity, i.e. interactions between species, shapes this  
76 evolutionary response will be instrumental to anticipate how ecosystems may change  
77 in response to global change.

78 Adaptation depends on several factors. For organisms with a short generation time  
79 and asexual reproduction, such as clonal populations of bacteria, mutations and  
80 horizontal gene transfer are the main sources of genetic variation (Anderson *et al.*,

81 2011). However, for species with longer generation times such as perennial plants  
82 selection more likely acts on standing genetic variation (Barrett & Schluter 2008),  
83 resulting in a sorting-out of suitable genotypes (Fakheran *et al.*, 2010). Furthermore,  
84 plants may adjust to a novel environment by phenotypic plasticity (Price *et al.*, 2003).

85 A possible indication for selection in grassland plant communities is the observed  
86 strengthening of biodiversity effects in field biodiversity experiments (Cardinale *et*  
87 *al.*, 2007; Fargione *et al.*, 2007; Reich *et al.*, 2012; Meyer *et al.*, 2016). An increase in  
88 complementarity between species resulted in an increasing positive effect of diversity  
89 on productivity over time (e.g. Meyer *et al.*, 2016). The increased complementarity  
90 could also have been a result of phenotypic plasticity (Ghalambour *et al.*, 2007).

91 However, recent common garden experiments with plant material from a grassland  
92 biodiversity experiment (the Jena Experiment, Roscher *et al.*, 2004) gave a clear  
93 indication for genetic divergence between monoculture and mixture types in multiple  
94 plant species (Zuppinge-Dingley *et al.*, 2014; van Moorsel *et al.*, 2018b), suggesting  
95 that natural selection in response to community diversity had occurred in the field. As  
96 a consequence, mixture types showed stronger complementarity effects (Loreau &  
97 Hector 2001) than monoculture types when grown in mixture, i.e. community  
98 productivity was increased due to increased differences in functional traits between  
99 species for mixture types (Zuppinge-Dingley *et al.*, 2014; van Moorsel *et al.*, 2018b).  
100 The emergence of such monoculture and mixture types, with different growth  
101 performance and plant functional trait variation, thus suggested that community  
102 diversity in the field likely acted as a selective environment (Zuppinge-Dingley *et al.*,  
103 2014; Rottstock *et al.*, 2017; van Moorsel *et al.*, 2018b). However, direct evidence for  
104 a genetic divergence between the different populations in the field experiment is still  
105 missing.

106 It should be noted that epigenetics, here defined as meiotically heritable changes in  
107 gene expression without changes to the underlying DNA sequence (Verhoeven *et al.*,  
108 2016), has also been proposed to play a role (Bird 2007; Bossdorf *et al.*, 2008; Tilman  
109 & Snell-Rood 2014). In a comment accompanying the publication of Zuppinge-  
110 Dingley *et al.* (2014), Tilman and Snell-Rood wrote: “[...] chance that the differences  
111 between the high- and low-diversity selection groups were due to genetic divergence.  
112 However, it is possible that epigenetic factors [...] could have had a simultaneous  
113 role” (Tilman & Snell-Rood 2014). Recent work on epigenetic recombinant inbred  
114 lines (epiRILs) of *Arabidopsis thaliana* suggests a considerable contribution of

115 induced epialleles to phenotypic variation, which is independent of genetic variation  
116 (Cortijo *et al.*, 2014; Kooke *et al.*, 2015). However, the importance of epigenetics in  
117 natural populations and whether it contributes to adaptation remains elusive  
118 (Quadrana & Colot 2016), in particular because it is difficult to separate epigenetic  
119 from genetic variation. A first step to disentangle genetic from epigenetic variation  
120 was achieved with apomictic clones of *Taraxacum officinale*, suggesting that  
121 differences in flowering time were mediated by differences in DNA methylation  
122 (Wilschut *et al.*, 2016). However, given the fundamental difference between apomixis  
123 (apomeiosis, parthenogenesis, autonomous endosperm formation) and sexual  
124 reproduction, the results from this study may not be directly transferable to non-  
125 apomictic plant species.

126 Here, we tested whether community diversity could act as a selective force leading  
127 to a divergence of phenotypes into monoculture and mixture types (Zuppingen-  
128 Dingley *et al.*, 2014; van Moorsel *et al.*, 2018b). In particular, we tested the  
129 hypothesis that the differentiation of plants into phenotypically distinct mixture  
130 (exhibiting stronger biodiversity effects) and monoculture types (exhibiting weaker  
131 biodiversity effects) within species was paralleled by genetic differentiation.  
132 Anticipating that the differentiation might also have been due to epigenetic  
133 variation, we chose a method which allowed us to analyze genetic and epigenetic  
134 variation between plants of six species, all herbaceous perennials of European  
135 grassland.

136

## 137 **Materials and Methods**

### 138 **Plant selection histories**

139 To test whether plant types selected over eleven years in mixtures differ genetically or  
140 epigenetically from those types selected in monocultures, we chose six species grown  
141 in monoculture and mixture plots in the Jena Experiment (Jena, Thuringia, Germany,  
142 51°N, 11°E, 135 m a.s.l., see Roscher *et al.* (2004) for experimental details). The  
143 following species belonging to three functional groups were selected: The three small  
144 herbs *Plantago lanceolata* L., *Prunella vulgaris* L. and *Veronica chamaedrys* L., the  
145 tall herb *Galium mollugo* L., and the two legumes *Lathyrus pratensis* L. and  
146 *Onobrychis viciifolia* Scop. For the experiment plants from three different selection  
147 histories were used (Fig. 1). Plants without a selection history in the experimental

148 field plots of the Jena experiment were obtained from commercial seed suppliers  
149 (Rieger Hoffmann GmbH, Blaufelden-Raboldshausen, Germany and Otto Hauenstein  
150 Samen AG, Switzerland), who also provided the seeds for the original set up of the  
151 Jena Experiment in 2002. Plants with a selection history in either mixture or  
152 monoculture had been growing in the Jena Experiment since 2002. In spring 2010,  
153 plant communities of 48 plots (12 monocultures, 12 two-species mixtures, 12 four-  
154 species mixtures and 12 eight-species mixtures) of the Jena Experiment were  
155 collected as cuttings, multiplied by repeated further cutting and then transplanted into  
156 an experimental garden in Zurich, Switzerland, in the identical plant composition as  
157 the original experimental plots for the first controlled sexual reproduction among co-  
158 selected plants (Zupping-Dingley *et al.*, 2014). In spring 2011, the seedlings  
159 produced from the seeds of the first controlled sexual reproduction in Zurich were  
160 transplanted back into those plots of the Jena Experiment from where the parents had  
161 originally been collected. In these newly established plots, plant communities with an  
162 identical composition to the original communities were maintained for three years  
163 until 2014 (van Moorsel *et al.*, 2018c).

164

## 165 Seed collection

166 To ensure a second sexual reproductive event for the collection of seed material,  
167 entire plant communities from some of the experimental plots replanted in Jena in  
168 2011 were excavated in March 2014 and used to establish new 1-m<sup>2</sup> plots in the  
169 experimental garden in Zurich. For this purpose, we excavated blocks of soil (0.5 m<sup>2</sup>)  
170 from plots in Jena including plant vegetation, seedlings and dormant seeds to make  
171 sure we transferred the entire plant community. These blocks of soil were then  
172 transferred and spread out into the plots in the experimental garden. We added a 30  
173 cm layer of soil (1:1 mixture of garden compost and field soil, pH 7.4, commercial  
174 name Gartenhumus, RICOTER Erdaufbereitung AG, Aarberg, Switzerland) to each  
175 plot to make sure the plants established. As for the first sexual reproduction event in  
176 2010, netting around each plot minimized the possibility of cross-pollination between  
177 the same species from different selection histories. Seeds from this second controlled  
178 sexual reproduction event were collected throughout the growing season of 2014 from  
179 monoculture plots and 4- and 8-species mixture plots. The exact community  
180 composition of the plots the seeds originated from is listed in Table S2. Seeds from

181 different mother plants were pooled together. The dry seeds were stored at 5° C for  
182 cold stratification until germination.

183

#### 184 Common garden experiment

185 Seeds were germinated in December 2014 with those from the same species being  
186 planted within the same day. Germination was done in germination soil  
187 (“Anzuchterde”, Ökohum, Herbertingen, Germany) under constant conditions in the  
188 glasshouse without additional light. Seedlings were planted in monocultures of four  
189 individuals and mixtures of two plus two individuals into 2-L pots filled with  
190 agricultural soil (50% agricultural sugar beet soil, 25% perlite, 25% sand; Ricoter AG,  
191 Aarberg, Switzerland). See van Moorsel *et al.* (2018b) for the experimental design  
192 and the planted combinations. In total, we planted 36 monoculture assemblies and 81  
193 mixture assemblies from mixture history, 48 monoculture assemblies and 159 mixture  
194 assemblies from monoculture history and 33 monoculture assemblies and 100 mixture  
195 assemblies from seedlings without a common selection history. Every species  
196 combination was replicated, if possible, six times for each selection history (resulting  
197 in 457 pots, referred to as “assemblies”, and 1828 plants). Seedlings that died within  
198 the first two weeks were replaced with seedlings of the same age.

199 The experiment was set up in six blocks with each block representing a replicate.  
200 Every block contained ca. 80 pots and within each block, pots were placed in the  
201 glasshouse in a randomized fashion without reference to selection history or species  
202 assembly. Single pots always contained four plants of a single selection history.  
203 During the experiment, plants were watered according to demand and grown at  
204 constant temperatures (17-20°C during the day, 13-17°C during the night) with no  
205 additional light added. The plants were not fertilized. The fungicide Fenicur (*Oleum*  
206 *foeniculi*, Andermatt Biocontrol) was applied on 5 May to control powdery mildew  
207 (*Podosphaera* spp.).

208

#### 209 Sampling

210 Samples for subsequent epigenetic and genetic analysis were harvested between 18  
211 and 28 May 2015, after twelve weeks of plant growth in the glasshouse. All four  
212 plants were sampled in each pot. One young leaf per plant was cut from the living

213 plant and immediately shock-frozen in liquid nitrogen. The samples were then stored  
214 at  $-80^{\circ}\text{C}$  in Zurich before shipment to the Netherlands for further processing.

215

## 216 Genetic analysis

217 We measured both genetic and epigenetic variation in monoculture- and mixture-type  
218 plants when propagated in monoculture and two-species mixed assemblies using a  
219 novel reference-free bisulfite method (van Gurp *et al.*, 2016). This method allows  
220 measuring DNA cytosine methylation levels and identifying single nucleotide  
221 polymorphisms with merely one lane of sequencing per 96 samples.

222

## 223 Sample procession and library preparation

224 The epiGBS protocol used is a further developed protocol based on the protocol of  
225 van Gurp *et al.* (2016). The main improvements are the used enzyme combination, a  
226 “wobble” adapter facilitating the computational removal of PCR duplicates, and a  
227 conversion control nucleotide that allows easier Watson / Crick identification. For 348  
228 samples, (Csp6I/NsiI) epiGBS libraries were created and sequenced on 4 Hiseq 2500  
229 lanes. These samples were divided over six species and three selection histories (see  
230 Tables S1, S2).

231

## 232 DNA extraction

233 Plant material was disrupted by bead-beating frozen leaf tissue in a 2 mL eppendorf  
234 tube with 2-3 mm stainless steel beads. No more than 100 mg of fresh tissue was used  
235 per sample. DNA isolation was performed using the NucleoSpin® 8 Plant II Core Kit  
236 (740669.5 Macherey Nagel). We followed the manufacturers protocol with the  
237 following modifications. Cell lysis was performed using Cell lysis buffer PL1 for 30  
238 instead of 10 min. After lysis and initial centrifugation, the lysate was carefully  
239 pipetted to a fresh 2.5 mL tubes, avoiding the cell debris. An extra centrifugation of 5  
240 min at 18.000 g step was performed and the lysate transferred to a 96-well rack for the  
241 next steps. At the step were the washed columns were dried, we centrifuged 5 min at  
242 4800 g to get rid of the last remaining wash buffer. The restriction enzymes of the first  
243 step of the epiGBS are very sensitive to ethanol and other contamination. DNA  
244 concentration was determined using Qubit® 2.0 Fluorometric dsDNA HS Assay Kit  
245 (Q32851 Life technologies).



246

## 247 DNA digestion and adapter ligation

248 Per individual, 30–300 ng genomic DNA was digested overnight (17 hrs) at 37° C in a  
249 volume of 40 µL containing 1x FD buffer (Thermo Scientific), and 2 µL of both  
250 *Csp6I* (FD0214, Thermo Scientific) and *NsiI* (R0127S, NEB). Following digestion,  
251 barcoded “wobble” adapters were ligated to the fragments (Fig. S1). To minimize the  
252 possibility of misidentifying samples as a result of sequencing or adapter synthesis  
253 error, all pair-wise combinations of barcodes differed by a minimum of three  
254 mutational steps. Barcode lengths were modulated from 4 bp to 6 bp to maximize the  
255 balance of the bases at each position in the overall set. For the ligation, 4 µL of a  
256 sample specific barcode combination of both BA and CO adapters (600 pg/µL), 6 µL  
257 T4 DNA ligase buffer, 1 µL T4 DNA ligase (M0202M, NEB) and 5 µL of distilled  
258 water were added to the digestion mix to a total volume of 60 µL. Ligation was  
259 performed for 3 hours at 22° C followed by 4° C overnight.

260

## 261 Pooling, clean-up and nick translation

262 In order to assess the quality of libraries, the pooling was performed per species level  
263 in batches of around 12 samples per pool. When pooled, the total volume of the pool  
264 was reduced by Qiaquick PCR cleanup (28104, Qiagen) to 40 µL. The libraries were  
265 size selected by a 0.8x Agencourt AMPure XP (A63880, Beckman coulter)  
266 purification favouring > 200 bp DNA fragments and eluted in a total volume of 22  
267 µL. To prevent the formation of adapter dimers, the barcoded adapters were not  
268 phosphorylated. Therefore, after the ligation, the insert DNA fragment–adapter  
269 connection was nicked at the 3' positions of the insert DNA fragment (Fig. S1). This  
270 nick is repaired by Nick translation that recreates the total non-(5mC) methylated  
271 adapter strand and during that process also “unwobbles” the adapters since the  
272 removed nucleotides are replaced by complementing nucleotides. This nick repair  
273 prevents the partial loss of the adapter during bisulfite treatment. The nick translation  
274 reaction (1 hour at 15° C) was performed in a reaction of 25 µL containing 19.25 µL  
275 of the purified library, 2.5 uL of 10 mM 5-methylcytosine dNTP Mix (D1030 Zymo  
276 research), 2.5 uL NEBuffer 2 and 0.75 uL DNA polymerase I (M0209, NEB).

277

## 278 Bisulfite conversion

279 For bisulfite conversion of non-methylated cytosines, 20  $\mu$ L of the nick-translated  
280 library was used. Bisulfite treatment was performed using the EZ DNA Methylation-  
281 Lightning™ Kit (Zymo Research) with the following program according to the  
282 manufacturers protocol: 8 min at 98° C, 1 h at 54 °C followed by up to 20 h at 4° C.

283

### 284 epiGBS PCR

285 Library amplification was performed in four individual 10  $\mu$ L reactions containing 1  
286  $\mu$ L ssDNA template, 5  $\mu$ L KAPA HiFi HotStart Uracil+ ReadyMix  
287 (Kapabiosystems), 3 pmol of each illumina PE PCR Primer (5'-  
288 AATGATACGGCGACCACCGAGATCTACACTCTTTCCCTACACGACGCTCTT  
289 CCGATCT-3' and 5'-  
290 CAAGCAGAAGACGGCATACGAGATCGGTCTCGGCATTCCTGCTGAACCGC  
291 TCTTCCGATCT-3'). Temperature cycling consisted of 95° C for 3 min followed by  
292 18 cycles of 98° C for 10 s, 65° C for 15 s, 72° C for 15 s with a final extension step  
293 at 72° C for 5 min. Replicate PCR products were pooled and quantified using a  
294 Qubit® dsDNA HS Assay Kit (Life technologies). The quality of the Libraries was  
295 assessed by analyzing 1  $\mu$ L on a High Sensitivity DNA chip on a 2100 Bioanalyzer  
296 system (Agilent). Libraries were considered suitable for sequencing if the majority of  
297 DNA fragments were between 150–400 bp. When the libraries passed quality control,  
298 they were pooled according to concentration and number of samples in the species  
299 pool, so that each individual sample was expected to yield an equal number of clusters  
300 on the Illumina flow cell. Before sequencing, the libraries were spiked with 10% PhiX  
301 control to increase the complexity of the libraries.

302

### 303 Sequencing

304 Finally, Paired-End sequencing was performed on a Hiseq2500 sequencer using the  
305 HiSeq v4 reagents and the latest version of the HiSeq Control Software (v2.2.38),  
306 which optimizes the sequencing of low-diversity libraries  
307 ([http://res.illumina.com/documents/products/technotes/technote-hiseq-low-](http://res.illumina.com/documents/products/technotes/technote-hiseq-low-diversity.pdf)  
308 [diversity.pdf](http://res.illumina.com/documents/products/technotes/technote-hiseq-low-diversity.pdf)). As the first five cycles of a sequencing run are used to calculate the  
309 color matrix, our barcode design achieves almost perfect balance of the first five  
310 nucleotides when equal numbers of sequences are obtained per “A” barcode. The “B”  
311 barcodes do not have this requirement; hence same length barcodes were used.

312 Sequencing reads were demultiplexed and deposited at SRA (SRA accession ID  
313 SRP132258). The barcode files can be accessed on Zenodo (DOI  
314 10.5281/zenodo.1167563). In total, we generated 132'884'678, 130'721'280,  
315 81'376'294, 140'883'779, 215'473'088, and 137'868'869 short reads for *G. mollugo*,  
316 *L. pratensis*, *O. viciifolia*, *P. lanceolata*, *P. vulgaris*, and *V. chamaedrys*, respectively.  
317

### 318 Statistical analysis

319 De-multiplexing, *de novo* reference construction, trimming, alignment, strand-specific  
320 variant calling, and methylation calling were done for each species as described in van  
321 Gulp *et al.* (2016). *De novo* reference sequences were annotated with DIAMOND  
322 (protein coding genes; NCBI non-redundant proteins as reference; version 0.8.22;  
323 Buchfink, Xie, and Huson 2015) and RepeatMasker (transposons and repeats;  
324 *Embryophyta* as reference “species”; version 4.0.6; Smit, Hubley, and Green 2013–  
325 2015). We summarized the transposable element and repeat classes into “transposons”  
326 comprising DNA, LTR, LINE, SINE, and RC transposon, and “repeats” including  
327 satellite, telomeric satellite, simple, rRNA, snRNA, unknown, and unclassified  
328 repeats. The annotation was then used to classify the genetic and epigenetic variants  
329 into the different feature contexts (e.g., to identify whether a single nucleotide  
330 polymorphism is located in a gene or a transposon). A summary of the reference  
331 sequences is given in Table S3.

332

### 333 Genetic variation: visualization of genetic distances with single 334 nucleotide polymorphisms (SNPs)

335 The following individuals with a SNP calling rate below 30% were *a priori* removed  
336 from the analysis of genetic variation: “pool\_pla\_lan\_15”, “pool\_pla\_lan\_46”,  
337 “pla\_lan\_81”, “pla\_lan\_82”, “pla\_lan\_52”, “pla\_lan\_83”, “pla\_lan\_95”,  
338 “pla\_lan\_111”, “pru\_vul\_60”, “pru\_vul\_79”, “pru\_vul\_80”, “pru\_vul\_87”,  
339 “pool\_pru\_vul\_22”, “pool\_pru\_vul\_24”, “ono\_vic\_15”, and “ver\_cha\_73”. These  
340 samples were well distributed across the experimental group, i.e., one or two for a  
341 single experimental group, except for the mixture-type mixture assembly of *P.*  
342 *lanceolata* for which three individuals were removed. For each species, we filtered the  
343 genetic variation data for single nucleotide polymorphisms (SNPs) sequenced in all

344 individuals with a total coverage between 5 and 200. SNPs homozygous for either the  
345 reference or the alternative allele in more than 90 % of all individuals were removed  
346 as uninformative SNPs. To reduce the impact of false positive SNP calls, we removed  
347 all SNPs located in contigs with more than 1 SNP per 50 basepairs because higher  
348 rates appear unlikely and may also originate from spurious alignments to the wrong  
349 reference contig (considering that the reference contigs represent only a minor  
350 fraction of the entire genome, there may be many reads originating from other  
351 locations not represented with a reference contig which are still similar enough to  
352 (wrongly) align to the reference). This also avoids that few contigs with high SNP  
353 rates drive the tests for genetic differentiation.

354 SNP allele frequencies were scaled with the function “scaleGen” from adegenet  
355 (version 2.0.1; Jombart 2008) and genetic distances between the individuals were  
356 visualized with t-SNE (van der Maaten and Hinton 2008, van der Maaten 2014). We  
357 calculated 100 maps starting from different random seeds and selected the map with  
358 the lowest final error. Individual maps were calculated in R with the package Rtsne  
359 (version 0.13; van der Maaten and Hinton 2008, van der Maaten 2014). Parameters  
360 for the function Rtsne were `pca = FALSE`, `theta = 0`, `perplexity = 10` (except for *O.*  
361 *viciifolia* for which `perplexity = 5`). To select the SNPs with the highest differentiation  
362 between the populations, we calculated Jost's D (Jost 2008) with the function  
363 “basic.stats” from hierfstat (version 0.04-22; Goudet & Jombart 2015) and only  
364 included the top 5% in the visualization.

365

366 Genetic variation: test for genetic differentiation between populations  
367 with single nucleotide polymorphisms (SNPs)

368 SNP data were processed and filtered as described before. Considering that our design  
369 only included two factors with two and three levels (assembly in the glasshouse and  
370 selection history respectively; and incomplete for all species except *P. vulgaris*), we  
371 did not use a hierarchical model (with assembly nested within) to test for genetic  
372 differentiation. Instead, we tested each factor within all levels of the other factor for  
373 genetic differentiation. Taking *P. vulgaris* as an example, we tested for genetic  
374 differentiation between plant histories within monoculture and mixture assemblies

375 (between all three histories and between monoculture and mixture types), and  
376 between assemblies within the naïve, monoculture, and mixture-type selection  
377 histories. For each test, we extracted the corresponding individuals and tested for  
378 genetic differentiation with the G-statistic test (Goudet *et al.*, 1996, function  
379 `gstat.randtest` implemented in the package `hierfstat`, version 0.04-22; Goudet &  
380 Jombart 2015). We did not correct for multiple testing because *P*-values were derived  
381 from 999 simulations and were thus limited to a minimal value of 0.001. Instead, we  
382 used a significance threshold of 0.01 and provide plots showing histograms of  
383 permuted G-statistics and the observed G-statistics. This analysis was carried out with  
384 the (1) entire data set, (2) SNPs located within genes, and (3) SNPs located within  
385 transposons. We chose to separately test SNPs in genes and transposons because we  
386 expected that selection more likely acted on genes and that selection of transposons  
387 would primarily occur due to genetic linkage to an advantageous gene. In addition, we  
388 expected that SNP calls are more reliable within genes because many transposon  
389 families tend to be highly repetitive.

390 To estimate the extent to which the genetic variation was caused by the  
391 differentiation between populations, we calculated average (i.e., across all tested  
392 SNPs) pairwise  $F_{ST}$  values with the function `pairwise.fst` from the package `adegenet`  
393 (version 2.0.1; Jombart 2008). Assuming that only few loci were under selection,  
394 many SNPs have  $F_{ST}$  values close to zero (only SNPs under selection have  $F_{ST}$  values  
395 clearly larger than zero). To estimate the maximal divergence between the  
396 populations, we therefore also calculated the  $F_{ST}$  of each individual SNP and extracted  
397 the 99<sup>th</sup> percentile (we chose the 99<sup>th</sup> percentile because this is more robust than the  
398 highest value).

399

#### 400 Epigenetic variation: characterization of genome-wide DNA methylation 401 levels

402 For each species, we filtered the epigenetic variation data for cytosines sequenced in  
403 at least three individuals per population (i.e., experimental group) with a total  
404 coverage between 5 and 200. To provide an overview of the genome-wide DNA  
405 methylation levels of the six species or each experimental group per species, we

406 visualized the DNA methylation levels of all cytosines averaged across all individuals  
407 with violin plots. We also visualized the average DNA methylation level within  
408 genes, transposons, repeats, and unclassified reference contigs with heat maps. Both  
409 were done either using all sequence contexts (CG, CHG, CHH) at once or separately  
410 for each sequence context.

411

## 412 Epigenetic variation: identification of differentially methylated cytosines 413 (DMCs)

414 DNA methylation data was processed and filtered as described before. Variation in  
415 DNA methylation at each individual cytosine was then analyzed with a linear model  
416 in R with the package DSS (version 2.24.0; Park and Wu 2016), according to a design  
417 with a single factor comprising all different experimental groups (similar to the  
418 approach described for RNA-Seq, Schmid 2017 and the testing procedure in Schmid  
419 *et al.*, 2018). Specific groups were compared with linear contrasts and *P*-values for  
420 each contrast were adjusted for multiple testing to reflect false discovery rates (FDR).  
421 Taking *P. vulgaris* as an example, we compared the three plant histories across both  
422 assemblies and within each assembly to each other. Likewise, we compared the two  
423 assemblies across all plant histories and within each to each other. A cytosine was  
424 defined as differentially methylated (DMC) if the FDR was below 0.01 for any of the  
425 contrasts.

426

## 427 **Results**

428 Visualization of genetic distances between the plant individuals using 5% of the loci  
429 with the strongest divergence between the populations clearly separated the  
430 individuals according to their selection history in five out of six species (Fig. 2). In  
431 addition to the separation by the selection history, individuals from *L. pratensis* also  
432 clustered according to the current diversity level (i.e., assembly). However,  
433 considering that the plants were assigned randomly to the assembly treatment, we  
434 expected a genetic differentiation according to the selection history but not the  
435 assembly. We therefore tested for a significant genetic divergence between the

436 selection histories and the assemblies with the G-statistics test (Fig. 3, S3 and S4,  
437 Goudet *et al.*, 1996).

438 Genetic differentiation was significant in all data sets ( $P \leq 0.001$ ), with two  
439 exceptions. First, the plant histories of *P. lanceolata* did not exhibit any significant  
440 genetic differentiation (only the test with all plant histories within monoculture  
441 assemblies in the data set with all SNPs was significant). Second, the test including  
442 only the monoculture and mixture types within the mixture assemblies was not  
443 significant for *L. pratensis*. In contrast, the tests comparing the monoculture and  
444 mixture assemblies within each of the plant histories were never significant ( $P >$   
445 0.01).

446 To estimate the amount of genetic variation explained by the plant histories, we  
447 calculated average pairwise  $F_{ST}$  values (Table S4) and the 99<sup>th</sup> percentiles of the SNP-  
448 wise  $F_{ST}$  values (Table 1 and Tables S5, S6). Average pairwise  $F_{ST}$  values for the  
449 different plant histories were between 0.014 (naïve vs. monoculture type within the  
450 monoculture assemblies of *L. pratensis*) and 0.1 (naïve vs. monoculture or mixture  
451 type within monoculture assemblies of *P. vulgaris*). The 99<sup>th</sup> percentiles were  
452 markedly higher and between 0.13 (monoculture vs. mixture types within mixture  
453 assemblies of *G. mollugo*) and 0.67 (all plant histories within mixture assemblies of *P.*  
454 *vulgaris*). Thus, overall, 1.4% to 10% of the genetic variation was explained by plant  
455 histories. However, for individual SNPs, plant histories could explain up to 67% of  
456 the genetic variation.

457 To get an overview of the DNA methylation data, we visualized overall DNA  
458 methylation levels for each plant species, sequence context (CG, CHG, CHH), and  
459 genomic feature context (genes, transposons, repeats, and unclassified contigs, Fig. 4).  
460 For all species, DNA methylation was generally highest in the CG context (80.3%),  
461 lower in the CHG context (59.7%), and lowest in CHH context (13.2%). Differences  
462 between species were most pronounced in the CHG context in which *L. pratensis*  
463 (77.1%) and *P. lanceolata* (85.8%) exhibited markedly higher methylation levels than  
464 the other four species (56.6%, 52.3%, 43.6%, and 53.1% in *G. mollugo*, *O. viciifolia*,  
465 *P. vulgaris*, and *V. chamaedrys*, respectively). Within each species and context, DNA  
466 methylation was highest in transposons and lowest in genes (Fig. 4B). Overall, these  
467 patterns are within the range of what was reported previously for other angiosperms  
468 (Niederhuth *et al.*, 2016).

469 For an initial comparison between the experimental groups, we visualized the  
470 overall DNA methylation levels as we did about for the genetic variation, but for each  
471 experimental group separately (Fig. S4). Given that the overall methylation levels  
472 appeared to be similar, we tested for significant differences in DNA methylation  
473 levels at each individual cytosine. On average, 1.8% of all tested cytosines were  
474 significant in at least one of the tested contrasts (FDR < 0.01, “DMCs” for  
475 differentially methylated cytosines, Table 1 for all contexts and Tables S5, S6, and S7  
476 for each context separately). Relative to the total number of cytosines tested,  
477 differences between plant histories (tested within or across both assemblies) were  
478 between 0.14% and 1.22% on average across all species and between 0.03% and  
479 1.99% per individual species. Differences between the two assemblies (tested within  
480 or across all plant histories) were between 0.04% and 0.15% on average across all  
481 species and between 0.03% and 0.35% per individual species. Thus, the fraction of  
482 differentially methylated cytosines between the plant histories was generally larger  
483 than differences between the two assemblies.

484 Within the plant histories, differences between the monoculture types and the naïve  
485 plants were between 0.20% and 1.22% within species. Differences between mixture  
486 types and naïve plants were between 0.13% and 1.27% within species. Differences  
487 between monoculture and mixture types were between 0.03% and 1.99% within  
488 species. However, if compared within each species separately, there were always  
489 more DMCs in the comparisons between plants from Jena and the naïve plants than in  
490 the comparison between monoculture and mixture types. The sole exception was *O.*  
491 *viciifolia* for which there were more differences between the monoculture and mixture  
492 types than between these and the naïve plants.

493 To further characterize the differences in DNA methylation, we calculated the  
494 average change in DNA methylation at the DMCs for each contrast, across and within  
495 all sequence contexts (CG, CHG, and CHH) and feature types (genes, transposons,  
496 repeats, and unclassified) and visualized these differences (Fig. 5). We could not  
497 identify clear patterns between the different comparisons with one exception:  
498 differences in the comparisons between plants from Jena and the naïve plants within  
499 genes (all sequence contexts) were mostly biased towards a higher methylation in the  
500 naïve plants. Thus, plants in the Jena Experiment lost on average DNA methylation at  
501 DMCs within genes (*O. viciifolia* was the exception with changes close to zero).



502

## 503 **Discussion**

504 We aimed at measuring to what extent differential selection in monoculture and  
505 mixed species grassland communities had influenced the genetic and epigenetic  
506 make-up of six grassland species and whether these mechanisms could have mediated  
507 the rapid phenotypic responses that were previously observed in plants with different  
508 diversity backgrounds (see Zuppingen-Dingley *et al.*, 2014; van Moorsel *et al.*,  
509 2018b). Strong genetic divergence within species in response to selection history was  
510 found in five out of six species, suggesting that in these five species different  
511 genotypes may have been sorted out from standing genetic variation that was present  
512 at the start of the diversity experiment. Less likely, recombination and mutation could  
513 also have contributed.

514 For *P. lanceolata*, no significant differentiation was found between monoculture  
515 and the mixture types within mixture assemblies. This may be due to the panmictic  
516 nature of *P. lanceolata*. Movement of pollen and seeds between plots together with  
517 high germination and establishment rates in this species may have leveled out genetic  
518 differentiation between plots of different species diversity. Furthermore, coverage was  
519 low and only a small proportion of the genome was covered, resulting in only 202  
520 SNPs in the dataset. We therefore cannot exclude the possibility that genetic variation  
521 was present but that our epiGBS screening missed the genomic regions under  
522 selection. For future research, we propose that increasing the sequencing coverage  
523 should be prioritized over adding more samples.

524 Only in *O. viciifolia* we found more genetic differences between the monoculture  
525 and mixture types than between these and naïve plants. This may be due to the fact  
526 that some subplots that were transplanted from the field site in Jena to the  
527 experimental plots contained only few individuals of *O. viciifolia*. The results indicate  
528 that *O. viciifolia* plant material originating from monoculture and mixture selection  
529 history could have originated from a singly ancestor, which resulted in a high degree  
530 of relatedness within each population. In contrast, the seeds sourced from the  
531 commercial supplier likely originated from many mother plants.

532 Overall, only 1.4% to 10% of genetic variation was explained by plant histories.  
533 However, for individual SNPs, plant histories could explain up to 67% of the genetic  
534 variation. This may indicate that only few loci were under selection (high

535 differentiation) and that most of the genome segregated randomly (low  
536 differentiation). Interestingly, this would suggest that the traits underlying the  
537 differentiation within species into monoculture and mixture types are not highly  
538 polygenic, thus making them accessible to breeding.

539 Our work supports the hypothesis that perennial grassland species in field  
540 experiments evolve as a response to their biotic environment (Zuppinge-Dingley *et al.*,  
541 2014; van Moorsel *et al.*, 2018b; van Moorsel *et al.*, 2018c). Recent experiments  
542 showed stronger complementarity effects (Loreau & Hector 2001) in communities  
543 with a selection history in species mixtures as opposed to plant individuals with a  
544 selection history in monocultures (Zuppinge-Dingley *et al.*, 2014; van Moorsel *et al.*,  
545 2018b). It has been under debate whether epigenetic or genetic mechanisms are the  
546 main driver of observed phenotypic variation in such scenarios (Rapp & Wendel  
547 2005; Bird 2007; Bossdorf *et al.*, 2008; Tilman & Snell-Rood 2014). In our  
548 experiment, we found genetic and epigenetic variation. However, genetic variation  
549 can have a major effect on epigenetic variation not only in *cis* but also in *trans* (Dubin  
550 *et al.*, 2015; Kawakatsu *et al.*, 2016). However, *cis* associations can also evolve  
551 independently of underlying genetic variation, when spontaneous epimutations are  
552 inherited through epigenetic inheritance (Taudt *et al.*, 2016). Thus, given the observed  
553 and the additional unobserved (only parts of the genome were sequenced) genetic  
554 variation, it seems plausible that most of the observed epigenetic variation was caused  
555 by the underlying genetic variation. This is in line with quantitative genetics studies in  
556 *A. thaliana* in which DNA methylation differences were found to be mostly associated  
557 with underlying genetic variation (e.g., Li *et al.*, 2014).

558 We did, however, also observe methylation differences between the assemblies in  
559 absence of genetic differentiation, even though these differences were small when put  
560 into context. A recent study using the same statistical method but a more stringent  
561 significance threshold (FDR < 0.001 instead of FDR < 0.01) compared DNA  
562 methylation profiles of different tissue types of the liverwort *Marchantia polymorpha*,  
563 covering important stages of the life cycle (Schmid *et al.*, 2018). With less than 1%  
564 DMCs, the differences between the two assemblies of this study correspond to the  
565 difference between two individual plants in Schmid *et al.* (2018). However, around  
566 42% of all cytosines varied significantly across the entire life cycle in that study.  
567 Thus, differences within individuals were much more pronounced than between  
568 individuals. Several other studies provide direct or indirect evidence for clear

569 differences in DNA methylation between different tissue, cell types or developmental  
570 stages (Jullien *et al.*, 2012; Calarco *et al.*, 2012; Ibarra *et al.*, 2012; Park *et al.*, 2016;  
571 Ingouff *et al.*, 2017; Bouyer *et al.*, 2017). Clearly, this does not exclude the possibility  
572 that epigenetics may play a role in adaptation (see Hauser *et al.*, 2011, Kronholm &  
573 Collins 2016 and Quadrana & Colot 2016 for examples of natural epialleles), but it  
574 makes it less likely that the strengthening of the biodiversity effect in the populations  
575 assessed in this study was due to epigenetic differences that were not a consequence  
576 of the underlying genetic differentiation.

577

### 578 **Conclusions**

579 We used novel genomic tools to study the importance of epigenetics for adaptation to  
580 novel biotic conditions in six non-model plant species differentially selected in a field  
581 biodiversity experiment. Future research should continue to integrate molecular tools  
582 with studies on non-model species in order to push the field forward (Richards *et al.*,  
583 2017; Heer *et al.*, 2018). Our findings suggest that selection on standing genetic  
584 variation is a powerful driver of evolution even in the absence of many generations of  
585 plant growth. In addition, we propose that community diversity had the selective  
586 power to differentiate plant populations within species into mixture and monoculture  
587 types in only a few generations. Molecular tools and the integration of evolutionary  
588 concepts into plant community ecology can open up new alleys of research, which  
589 should be exploited in order to understand the community evolutive processes (Shafer  
590 *et al.*, 2015) that lead to the plant community compositions and structures as we see  
591 them today.

592

### 593 **Acknowledgements**

594 We thank T. Zwimpfer, M. Furler, D. Trujillo and D. Topalovic for technical  
595 assistance. Thanks to T. Hahl for help with the glasshouse experiment. This study was  
596 supported by the Swiss National Science Foundation (grants number 147092 and  
597 166457 to B. Schmid) and the University Research Priority Program Global Change  
598 and Biodiversity of the University of Zurich. S.J.V.M. was furthermore supported by  
599 a travel grant from the ESF Congenomics network (reference number 7167).

600

### 601 **Author contributions**

602 S.J.V.M, P.V. and B.S. planned and designed the study, S.J.V.M. carried out the pot  
603 experiment and collected plant material, C.A.M.W. performed the lab work and  
604 created the sequencing library and T.V.G. created the bioinformatics pipeline. M.W.S.  
605 analyzed the data and produced the figures. S.J.V.M and M.W.S. wrote the first draft  
606 of the manuscript. All authors contributed to revisions.

607

## 608 **References**

609

610 **Anderson JT, Willis JH, Mitchell-Olds T. 2011.** Evolutionary genetics of plant  
611 adaptation. *Trends in Genetics* 27:258–266.

612 **Barrett R, Schluter D. 2008.** Adaptation from standing genetic variation. *Trends in*  
613 *Ecology & Evolution* 23:38–44.

614 **Bastolla U, Fortuna MA, Pascual-García A, Ferrera A, Luque B, Bascompte J.**  
615 **2009.** The architecture of mutualistic networks minimizes competition and  
616 increases biodiversity. *Nature* 458:1018–1020.

617 **Bird A. 2007.** Perceptions of epigenetics. *Nature* 447:396–398.

618 **Bossdorf O, Richards CL, Pigliucci M. 2008.** Epigenetics for ecologists. *Ecology*  
619 *letters* 11:106–15.

620 **Bouyer D, Kramdi A, Kassam M, Heese M, Schnittger A, Roudier F, Colot V.**  
621 **2017.** DNAmethylation dynamics during early plant life. *Genome Biology*  
622 18:179.

623 **Calarco JP, Borges F, Donoghue MTA, Van Ex F, Jullien PE, Lopes R, Gardner**  
624 **R, Berger F, Feijó JA, Becker JD. 2012.** Reprogramming of DNA  
625 methylation in pollen guides epigenetic inheritance via small RNA. *Cell*  
626 151:194–205.

627 **Cardinale BJ, Wright JP, Cadotte MW, Carroll IT, Hector A, Srivastava DS,**  
628 **Loreau M, Weis JJ. 2007.** Impacts of plant diversity on biomass production  
629 increase through time because of species complementarity. *Proceedings of the*  
630 *National Academy of Sciences* 104:18123–18128.

631 **Cortijo S, Wardenaar R, Colomé-Tatché M, Gilly A, Etcheverry M, Labadie K,**  
632 **Caillieux E, Hospital F, Aury J-M, Wincker P, et al. 2014.** Mapping the  
633 epigenetic basis of complex traits. *Science* 343:1145–1148.

- 634 **Dubin MJ, Zhang P, Meng D, Remigereau MS, Osborne EJ, Paolo Casale F,**  
635 **Drewe P, Kahles A, Jean G, Vilhjálmsson B, *et al.*,2015.** DNA methylation  
636 in Arabidopsis has a genetic basis and shows evidence of local adaptation.  
637 *Elife* 4:e05255.
- 638 **Fakheran S, Paul-Victor C, Heichinger C, Schmid B, U. Grossniklaus U,**  
639 **Turnbull L. 2010.** Adaptation and extinction in experimentally fragmented  
640 landscapes. *Proceedings of the National Academy of Sciences* 107:19120–  
641 19125.
- 642 **Fargione J, Tilman D, Dybzinski R, Lambers JHR, Clark C, Harpole WS, Knops**  
643 **JM, Reich PB, Loreau M. 2007.** From selection to complementarity: shifts in  
644 the causes of biodiversity-productivity relationships in a long-term  
645 biodiversity experiment. *Proceedings of the Royal Society B: Biological*  
646 *Sciences* 274:871–876.
- 647 **Gervasi DDL, Schiestl FP. 2017.** Real-time divergent evolution in plants driven by  
648 pollinators. *Nature communication* 8:14691.
- 649 **Ghalambour CK, McKay JK, Carroll SP, Reznick DN. 2007.** Adaptive versus  
650 non-adaptive phenotypic plasticity and the potential for contemporary  
651 adaptation in new environments. *Functional Ecology* 21:394–407.
- 652 **Goudet, J, Raymond, M, Meeüs, T, Rousset, F. 1996.** Testing differentiation in  
653 diploid populations. *Genetics* 144:1933-1940.
- 654 **Goudet J, Jombart T. 2015.** hierfstat: Estimation and Tests of Hierarchical F-  
655 Statistics. R package version 0.04-22. [https://CRAN.R-](https://CRAN.R-project.org/package=hierfstat)  
656 [project.org/package=hierfstat](https://CRAN.R-project.org/package=hierfstat)
- 657 **van Gorp TP, Wagemaker NCAM, Wouters B, Vergeer P, Ouborg JNJ,**  
658 **Verhoeven KJF. 2016.** epiGBS: reference-free reduced representation  
659 bisulfite sequencing. *Nature Methods* 13:322–324.
- 660 **Hairston NG, Ellner SP, Geber MA, Yoshida T, Fox JA. 2005.** Rapid evolution  
661 and the convergence of ecological and evolutionary time. *Ecology Letters*  
662 8:1114–1127.
- 663 **Hauser M-T, Aufsatz W, Jonak C, Luschnig C. 2011.** Transgenerational epigenetic  
664 inheritance in plants. *Biochim Biophys Acta* 1809:459–468.
- 665 **Heer K, Mounger J, Boquete MT, Richards CL, Opgenoorth L. 2018.** The  
666 diversifying field of plant epigenetics. *New Phytologist* 217:988–992.

- 667 **Ibarra CA, Feng X, Schoft VK, Hsieh T-F, Usawa R, Rodrigues JA, Zemach A,**  
668 **Chumak N, Machlicova A, Nishimura T, et al.,2012.** Active DNA  
669 demethylation in plant companion cells reinforces transposon methylation in  
670 gametes. *Science* 337:1360–1364.
- 671 **Ingouff M, Selles B, Michaud C, Vu TM, Berger F, Schorn AJ, Autran D, Van**  
672 **Durme M, Nowack MK, Martienssen RA, et al.,2017.** Live-cell analysis of  
673 DNA methylation during sexual reproduction in *Arabidopsis* reveals context  
674 and sex-specific dynamics controlled by noncanonical RdDM. *Genes &*  
675 *Development* 31:72–83.
- 676 **Isbell F, Craven D, Connolly J, Loreau M, Schmid B, Beierkuhnlein C, Bezemer**  
677 **TM, Bonin C, Bruelheide H, de Luca E, et al.,2015.** Biodiversity increases  
678 the resistance of ecosystem productivity to climate extremes. *Nature* 526:574–  
679 577.
- 680 **Jombart T. 2008.** Adegnet: A R Package for the Multivariate Analysis of Genetic  
681 Markers. *Bioinformatics* 24: 1403–5.
- 682 **Joshi J, Schmid B, Caldeira MC, Dimitrakopoulos PG, Good J, Harris R, Hector**  
683 **A, Huss-Danell K, Jumpponen A, Minns A et al.,2001.** Local adaptation  
684 enhances performance of common plant species. *Ecology Letters* 4:536–544.
- 685 **Jost L. 2008.**  $G_{ST}$  and its relatives do not measure differentiation. *Molecular Ecology*  
686 17:4015–4026.
- 687 **Jullien PE, Susaki D, Yelagandula R, Higashiyama T, Berger F. 2012.** DNA  
688 methylation dynamics during sexual reproduction in *Arabidopsis thaliana*.  
689 *Current Biology* 22:1825–1830.
- 690 **Kawakatsu T, Huang SC, Jupe F, Sasaki E, Schmitz RJ, Urich MA, Castanon R,**  
691 **Nery JR, Barragan C, He Y, et al.,2016.** Epigenomic Diversity in a Global  
692 Collection of *Arabidopsis thaliana* Accessions. *Cell* 166:492-505.
- 693 **Kleynhans EJ, Otto SP, Reich PB, Vellend M. 2016.** Adaptation to elevated CO<sub>2</sub> in  
694 different biodiversity contexts. *Nature Communications* 7:12358.
- 695 **Kooke R, Johannes F, Wardenaar R, Becker F, Etcheverry M, Colot V,**  
696 **Vreugdenhil D, Keurentjes, JJB. 2015.** Epigenetic basis of morphological  
697 variation and phenotypic plasticity in *Arabidopsis thaliana*. *Plant Cell* 27:  
698 337–348.
- 699 **Kronholm I, Collins S. 2016.** Epigenetic mutations can both help and hinder  
700 adaptive evolution. *Molecular Ecology* 25: 1856–1868.

- 701 **Li Y, Cheng R, Spokas KA, Palmer AA, Borevitz JO. 2014.** Genetic variation for  
702 life history sensitivity to seasonal warming in *Arabidopsis thaliana*. *Genetics*  
703 196: 569–577.
- 704 **Lipowsky A, Schmid B, Roscher C. 2011.** Selection for monoculture and mixture  
705 genotypes in a biodiversity experiment. *Basic and Applied Ecology* 12:360–  
706 371.
- 707 **Loreau M, Hector A. 2001.** Partitioning selection and complementarity in  
708 biodiversity experiments. *Nature* 412:72–76.
- 709 **de Meeûs T, Goudet J. 2007.** “A step-by-step tutorial to use HierFstat to analyse  
710 populations hierarchically structured at multiple levels.” *Infection, Genetics*  
711 *and Evolution* 7: 731-735.
- 712 **Meyer ST, Ebeling A, Eisenhauer N, Hertzog L, Hillebrand H, Milcu A, Pompe**  
713 **S, Abbas M, Bessler H, Buchmann N, et al., 2016.** Effects of biodiversity  
714 strengthen over time as ecosystem functioning declines at low and increases at  
715 high biodiversity. *Ecosphere* 7:e01619.
- 716 **van der Maaten L, Hinton G. 2008.** Visualizing data using t-SNE. *Journal of*  
717 *Machine Learning Research* 9:2579–2605.
- 718 **van der Maaten L. 2014.** Accelerating t-SNE using tree-based algorithms. *Journal of*  
719 *machine learning research* 15:3221–3245.
- 720 **van Moorsel SJ, Hahl T, Petchey OL, Ebeling A, Eisenhauer N, Schmid B, Wagg**  
721 **C. 2018a.** Evolution increases ecosystem temporal stability and recovery from  
722 a flood in grassland communities. *bioRxiv*.
- 723 **van Moorsel SJ, Schmid MW, Hahl T, Zuppinger-Dingley D, Schmid B. 2018b.**  
724 Selection in response to community diversity alters plant performance in and  
725 functional traits. *bioRxiv*.
- 726 **van Moorsel SJ, Hahl T, Wagg C, De Deyn GB, Flynn DFB, Zuppinger-Dingley**  
727 **D, Schmid B. 2018c.** Community evolution increases plant productivity at  
728 low diversity. *Ecology Letters* 21:128–137.
- 729 **Niederhuth CE, Bewick AJ, Ji L, Alabady MS, Kim KD, Li Q, Rohr NA,**  
730 **Rambani A, Burke JM, Udall JA, et al., 2016.** Widespread natural variation  
731 of DNA methylation within angiosperms. *Genome Biology* 17:194.
- 732 **Ouborg NJ, Vergeer P, Mix C. 2006.** The rough edges of the conservation genetics  
733 paradigm for plants. *Journal of Ecology* 94:1233–1248.

- 734 **Park K, Kim MY, Vickers M, Park J-S, Hyun Y, Okamoto T, Zilberman D,**  
735 **Fischer RL, Feng X, Choi Y, *et al.*,2016.** DNA demethylation is initiated in  
736 the central cells of *Arabidopsis* and rice. PNAS 113:15138–15143.
- 737 **Park Y, Wu H. 2016.** Differential methylation analysis for BS-seq data under general  
738 experimental design. Bioinformatics 32: 1446–1453.
- 739 **Price TD, Qvarnstrom A, Irwin DE. 2003.** The role of phenotypic plasticity in  
740 driving genetic evolution. Proceedings of the Royal Society B: Biological  
741 Sciences 270:1433–1440.
- 742 **Quadrana L, Colot V. 2016.** Plant transgenerational epigenetics. Annual Review of  
743 Genetics 50:467–491.
- 744 **Rapp RA, Wendel JF. 2005.** Epigenetics and plant evolution. New Phytologist  
745 168:81–91.
- 746 **Reich PB, Tilman D, Isbell F, Mueller K, Hobbie SE, Flynn DFB, Eisenhauer N.**  
747 **2012.** Impacts of biodiversity loss escalate through time as redundancy fades.  
748 Science 336:589–592.
- 749 **Richards CL, Alonso C, Becker C, Bossdorf O, Bucher E, Colomé-Tatché M,**  
750 **Durka W, Engelhardt J, Gaspar B, Gogol-Döring A, *et al.*,2017.**  
751 Ecological plant epigenetics: Evidence from model and non-model species,  
752 and the way forward. Ecology Letters 20:1576–1590.
- 753 **Roscher C, Schumacher J, Baade J, Wilcke W, Gleixner G, Weisser WW,**  
754 **Schmid B, Schulze E-D. 2004.** The role of biodiversity for element cycling  
755 and trophic interactions: an experimental approach in a grassland community.  
756 Basic and Applied Ecology 5:107–121.
- 757 **Rottstock T, Kummer V, Fischer M, Joshi J. 2017.** Rapid transgenerational effects  
758 in *Knautia arvensis* in response to plant community diversity. Journal of  
759 Ecology 105:714–725.
- 760 **Schmid B. 1985.** Clonal Growth in Grassland Perennials: III. Genetic Variation and  
761 Plasticity Between and Within Populations of *Bellis Perennis* and *Prunella*  
762 *Vulgaris*. Journal of Ecology 73:819–830.
- 763 **Schmid MW. 2017.** RNA-Seq data analysis protocol: Combining in-house and  
764 publicly available data. In: Plant germline development: Methods and  
765 protocols. Schmidt A, editor. New York, NY: Springer New York; 2017. pp.  
766 309–35.



- 767 **Schmid MW, Giraldo-Fonseca A, Rövekamp M, Smetanin D, Bowman JL,**  
768 **Grossniklaus U. 2018.** Extensive epigenetic reprogramming during the life  
769 cycle of *Marchantia polymorpha*. *Genome Biology* 19:9.
- 770 **Schoener TW. 2011.** The newest synthesis: Understanding the interplay of  
771 evolutionary and ecological dynamics. *Science* 331:426–429.
- 772 **Shafer ABA, Wolf JBW, Alves PC, Bergström L, Bruford MW, Brännström I,**  
773 **Colling G, Dalén L, De Meester L, Ekblom R. et al.,2015.** Genomics and the  
774 challenging translation into conservation practice. *Trends in Ecology &*  
775 *Evolution* 30:78–87.
- 776 **Slobodkin LB. 1961.** Growth and regulation of animal populations. Holt, Rinehart  
777 and Winston, New York.
- 778 **Smit AFA, Hubley R, Green P. 2013–2015.** RepeatMasker Open-4.0.  
779 <http://www.repeatmasker.org/>.
- 780 **Taudt A, Colomé-Tatché M, Johannes F. 2016.** Genetic sources of population  
781 epigenomic variation. *Nature Reviews Genetics* 17: 319–332.
- 782 **Tilman D, Snell-Rood EC. 2014.** Ecology: Diversity breeds complementarity.  
783 *Nature* 515:44–45.
- 784 **Verhoeven KJF, vonHoldt BM, Sork VL. 2016.** Epigenetics in ecology and  
785 evolution: what we know and what we need to know. *Molecular Ecology*  
786 25:1631–1638.
- 787 **Wilschut RA, Oplaat C, Snoek LB, Kirschner J, Verhoeven KJF. 2016.** Natural  
788 epigenetic variation contributes to heritable flowering divergence in a  
789 widespread asexual dandelion lineage. *Molecular Ecology* 25:1759–1768.
- 790 **Zuppinge-Dingley D, Schmid B, Petermann JS, Yadav V, De Deyn GB, Flynn**  
791 **DFB. 2014.** Selection for niche differentiation in plant communities increases  
792 biodiversity effects. *Nature* 515:108–111.

793

#### 794 **Data Accessibility Statement**

795 Data will be made publicly available on Zenodo (DOI 10.5281/zenodo.1167563) and  
796 SRA (accession ID SRP132258) at time of acceptance.

797

#### 798 **Supporting information**

799 Additional Supporting Information may be found online in the Supporting  
800 Information tab for this article:

801 **Fig. S1** Adapter overview.

802 **Fig. S2** Results from the G-statistic tests given all SNPs within genes.

803 **Fig. S3** Results from the G-statistic tests given all SNPs within transposons.

804 **Fig. S4** DNA methylation levels in % at individual cytosines across all or within each  
805 individual sequence context (CG, CHG, CHH) for each experimental group of each  
806 species used.

807 **Table S1** Sample overview.

808 **Table S2** Community diversity and composition of the plots the seeds originated  
809 from.

810 **Table S3** Reference sequences generated in this study.

811 **Table S4** Average pairwise  $F_{ST}$  values.

812 **Table S5** 99<sup>th</sup> percentiles of  $F_{ST}$  values in the SNPs within genes.

813 **Table S6** 99<sup>th</sup> percentiles of  $F_{ST}$  values in the SNPs within transposons.

814 **Table S7** Number of cytosines with significant differences (FDR < 0.01) in DNA  
815 methylation between selection-history treatments and assemblies in the CG sequence  
816 context.

817 **Table S8** Number of cytosines with significant differences (FDR < 0.01) in DNA  
818 methylation between selection-history treatments and assemblies in the CHG  
819 sequence context.

820 **Table S9** Number of cytosines with significant differences (FDR < 0.01) in DNA  
821 methylation between selection-history treatments and assemblies in the CHH  
822 sequence context.

823

824

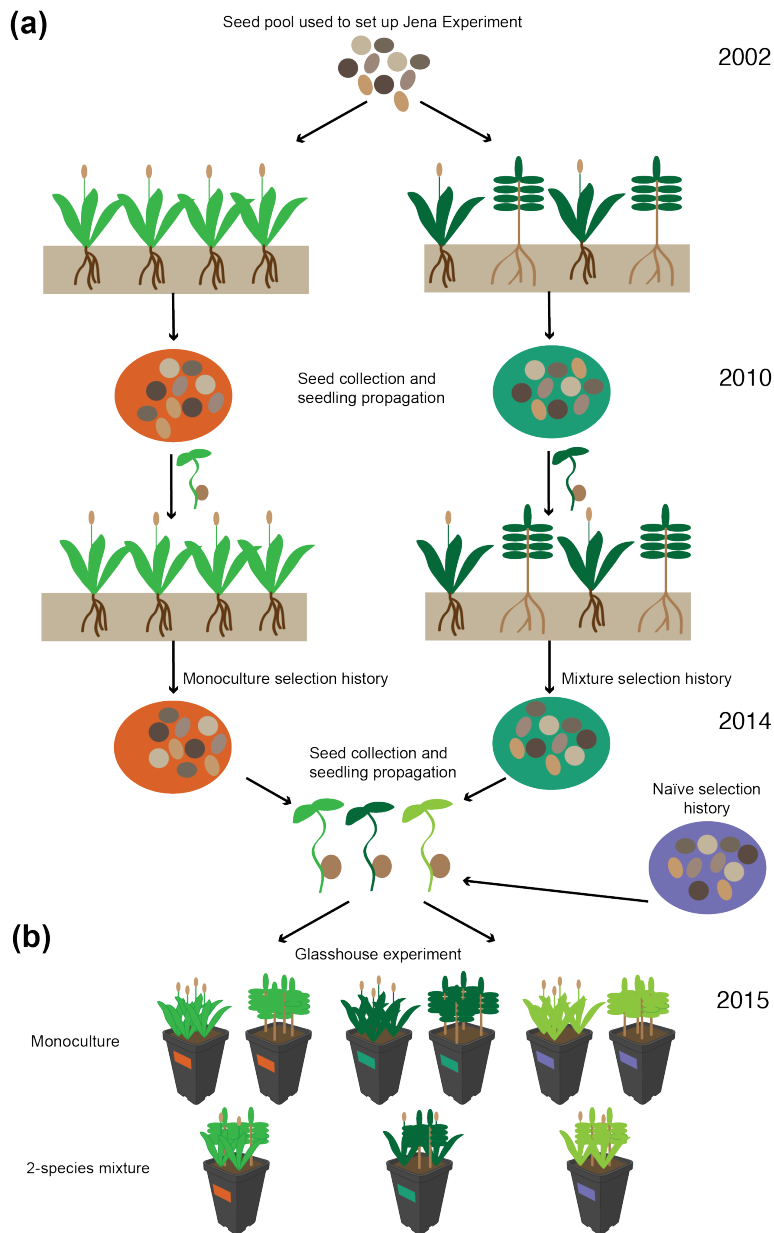

825

826 **Fig. 1** (a) The origin of seeds used for the glasshouse experiment and genetic analysis.

827 Seedlings were planted in mixtures and monocultures in Jena in the year 2002. Two

828 reproduction events occurred when seeds were collected and subsequently new

829 seedlings were produced and planted again in the same community composition. (b)

830 Schematic representation of the glasshouse experiment. Monoculture assemblies and

831 2-species mixture assemblies were planted with either plants with mixture selection

832 history (green), monoculture selection history (orange) or naïve plants originating

833 from a commercial seed supplier (blue). Figure modified after van Moorsel *et al.*

834 (2018b).

835

836

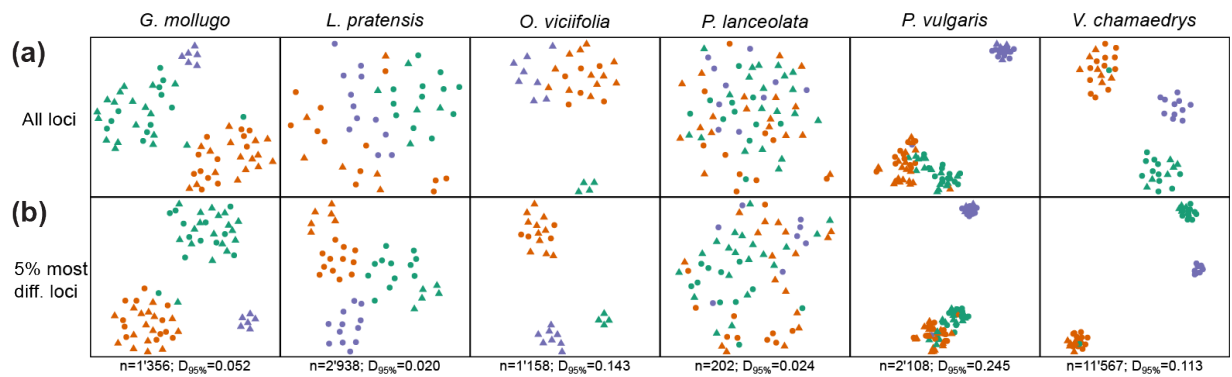

837

838 **Fig. 2** Genetic distance between individuals of the different populations for the six  
839 species. (a) All loci included in the analyses. (b) Only the 5% most differentiated loci  
840 between the experimental groups included. Green: selection history in mixture,  
841 orange: selection history in monocultures, blue: naïve selection history. Triangles:  
842 current assembly monoculture, circles: current assembly mixture. D<sub>95%</sub> is the  
843 threshold to choose the 5% most differentiated loci based on Jost's D (the 95%  
844 percentile in the entire data set, Jost 2008).

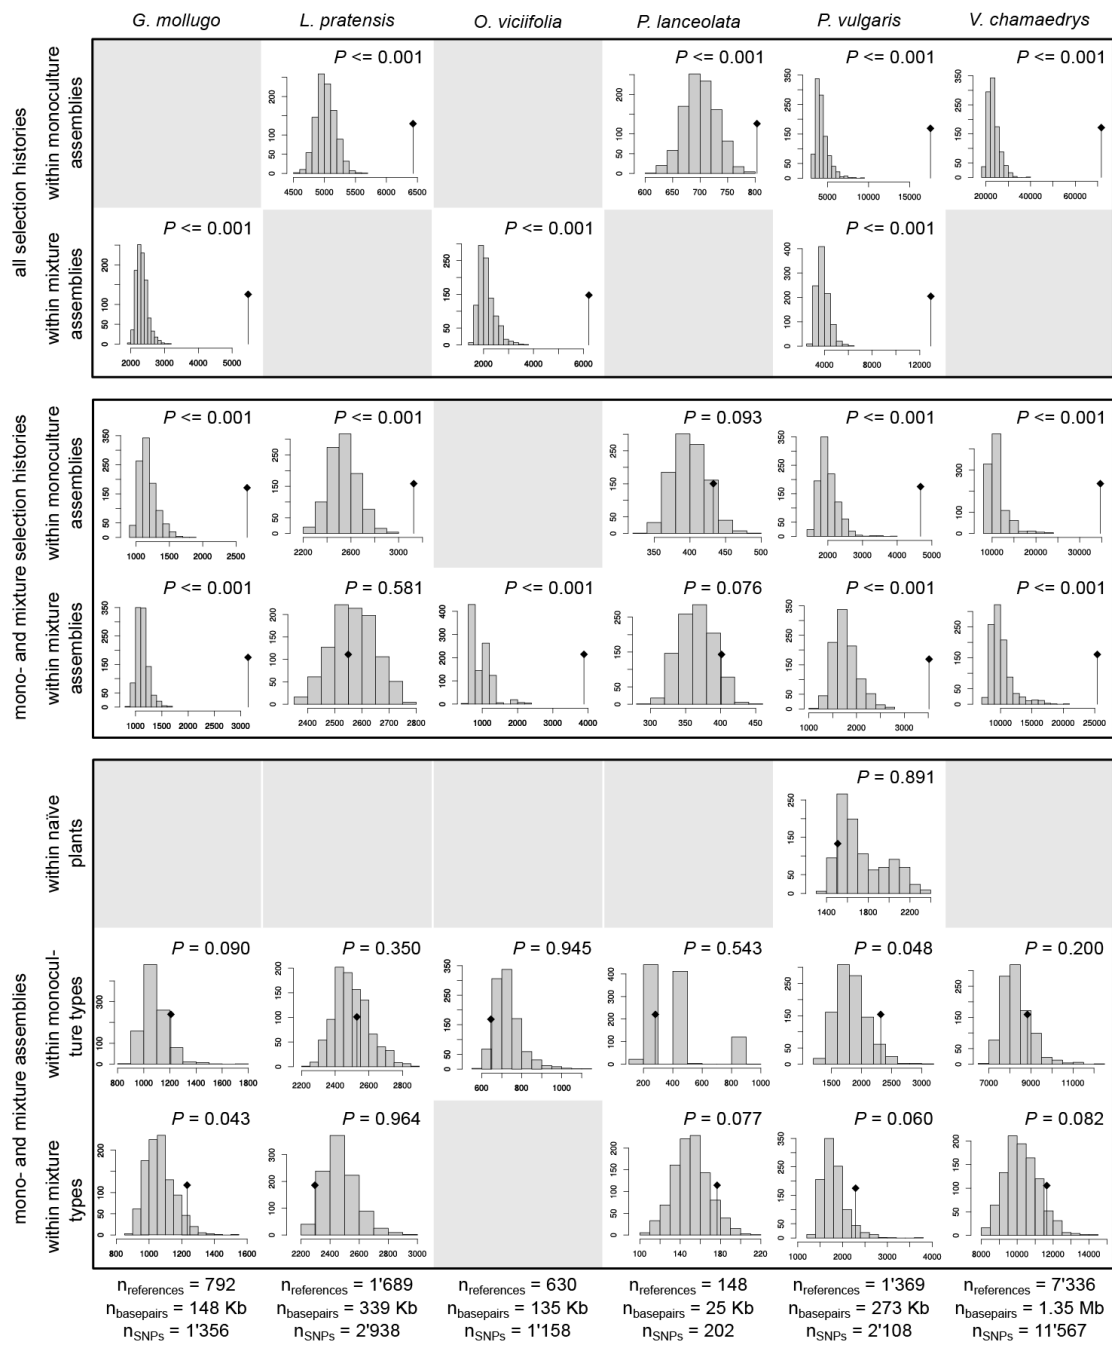

845

846 **Fig. 3** Results from the G-statistic tests given all SNPs. Each panel shows a histogram  
 847 of permuted test statistics (999 permutations) and indicates the observed statistics by a  
 848 black dot and a segment. Test statistics are on the x-axis, frequencies on the y-axis.

849 Grey boxes where data was not available (experimental group missing).

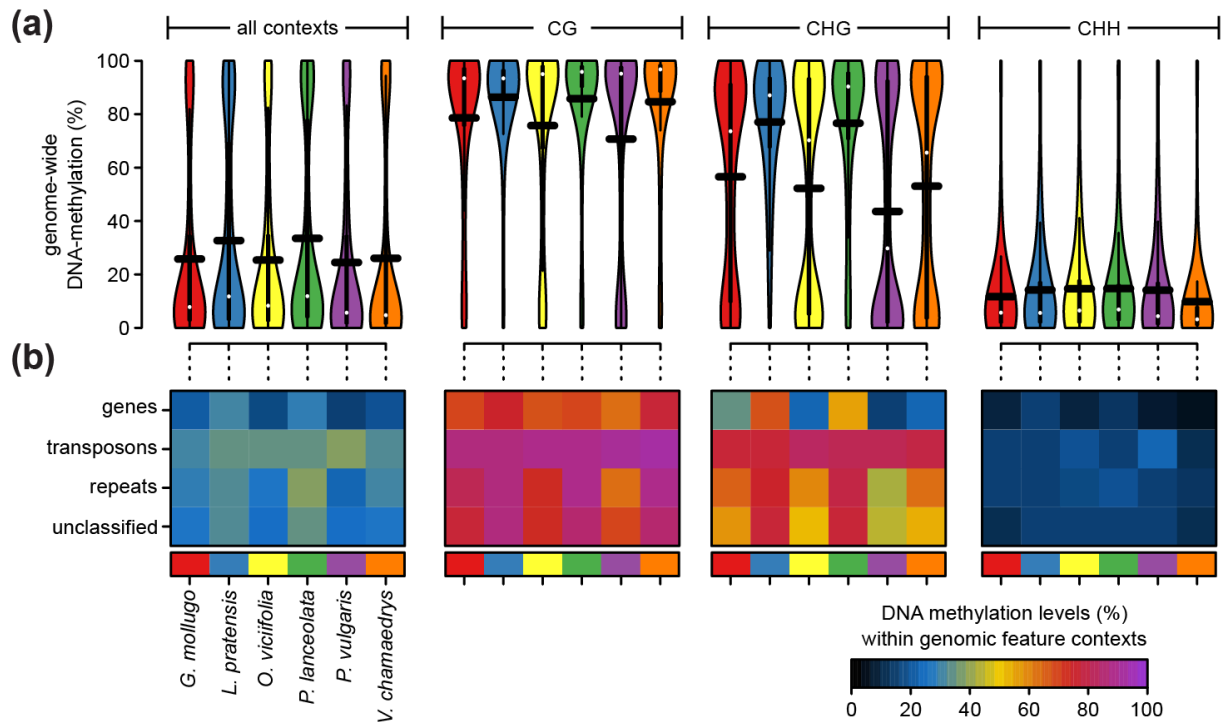

850

851 **Fig. 4** (a) DNA methylation levels in percent at individual cytosines across all or  
852 within each individual sequence context (CG, CHG, CHH) for each species used in  
853 this study shown as violin plots. The horizontal black bars correspond to the means.  
854 (b) Average DNA methylation levels in percent for each sequence context, genomic  
855 feature, and species shown as a heat map.

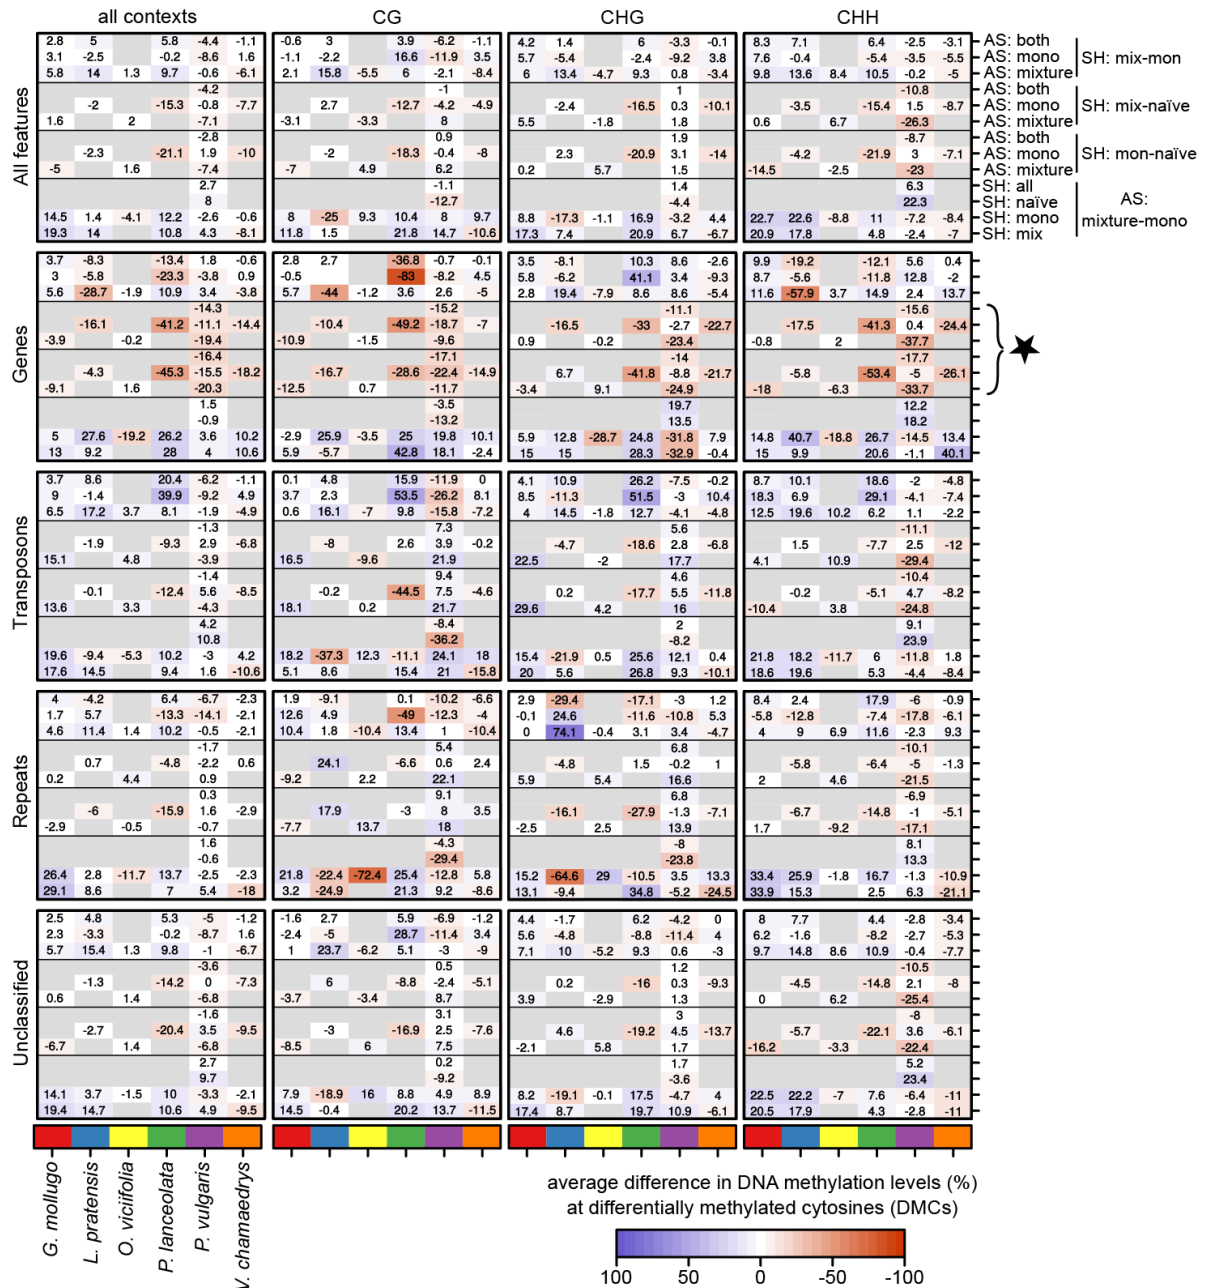

856

857 **Fig. 5** Average differences in DNA methylation at significantly differentially  
 858 methylated cytosines (DMCs; FDR < 0.01) within a given sequence (all, CG, CHG,  
 859 and CHH) and feature (all, genes, transposons, repeats, unclassified) context are  
 860 shown for all contrasts. The average differences are shown as colour gradient. The  
 861 numbers within the heat map are the average differences. The asterisk marks the rows  
 862 showing that plants in the Jena field lost on average DNA methylation at DMCs  
 863 within genes compared to naïve plants.

864 **Table 1** 99<sup>th</sup> percentile of FST values in the data set with all SNPs.

|                                         | <i>G. mollugo</i> | <i>L. pratensis</i> | <i>O. viciifolia</i> | <i>P. lanceolata</i> | <i>P. vulgaris</i> | <i>V. chamaedrys</i> |
|-----------------------------------------|-------------------|---------------------|----------------------|----------------------|--------------------|----------------------|
| SH in monoculture                       | NA                | 0.10641             | NA                   | 0.1413               | 0.6032             | 0.29453              |
| SH in mixture                           | 0.2354            | NA                  | 0.4                  | NA                   | 0.67471            | NA                   |
| SH contrast mono vs. mix in monoculture | 0.1579            | 0.1                 | NA                   | 0.09282              | 0.25               | 0.2571               |
| SH contrast mono vs. mix in mixture     | 0.13332           | 0.1462              | 0.3333               | 0.05899              | 0.15592            | 0.3333               |
| AS for naïve history                    | NA                | NA                  | NA                   | NA                   | 0.13182            | NA                   |
| AS for mono history                     | 0.0755            | 0.0909              | 0.08469              | 0.0762               | 0.10173            | 0.14305              |
| AS for mix history                      | 0.08355           | 0.0926              | NA                   | 0.09214              | 0.12               | 0.1586               |

865 AS = assembly, SH = selection history. For SNPs within genes or transposons see

866 Tables S5 and S6.

867



868 **Table 2** Number of cytosines with significant differences (FDR < 0.01) in DNA  
 869 methylation between selection-history treatments and assemblies.

|                                | <i>G. mollugo</i> | <i>L. pratensis</i> | <i>O. viciifolia</i> | <i>P. lanceolata</i> | <i>P. vulgaris</i> | <i>V. chamaedrys</i> | average<br>% |
|--------------------------------|-------------------|---------------------|----------------------|----------------------|--------------------|----------------------|--------------|
| SH: mixture vs. monoculture    | 6365<br>(0.55%)   | 239 (0.03%)         | -                    | 582 (0.11%)          | 6578<br>(0.28%)    | 12966 (0.60%)        | 0.31%        |
| % in genes                     | 13.68             | 4.6                 |                      | 4.47                 | 12.82              | 11.51                |              |
| % in transposons               | 10.65             | 30.54               |                      | 8.25                 | 11.28              | 8.18                 |              |
| % in repeats                   | 4.41              | 4.18                |                      | 8.93                 | 6.67               | 4.63                 |              |
| % in unclassified contigs      | 71.25             | 60.67               |                      | 78.35                | 69.23              | 75.68                |              |
| >> within monoculture assembly | 2332<br>(0.20%)   | 360 (0.05%)         | -                    | 216 (0.04%)          | 2507<br>(0.11%)    | 6507 (0.30%)         | 0.14%        |
| % in genes                     | 12.22             | 4.72                |                      | 6.48                 | 10.33              | 10.7                 |              |
| % in transposons               | 11.11             | 28.61               |                      | 7.87                 | 11.61              | 8.16                 |              |
| % in repeats                   | 3.82              | 4.72                |                      | 12.04                | 5.78               | 4.84                 |              |
| % in unclassified contigs      | 72.86             | 61.94               |                      | 73.61                | 72.28              | 76.3                 |              |
| >> within mixture assembly     | 4617<br>(0.40%)   | 288 (0.04%)         | 10353<br>(1.99%)     | 2573 (0.47%)         | 8875<br>(0.37%)    | 5538 (0.25%)         | 0.59%        |
| % in genes                     | 11.63             | 4.17                | 12.13                | 3.26                 | 11.14              | 9.73                 |              |
| % in transposons               | 10.92             | 34.38               | 15.94                | 11.31                | 14.6               | 8.22                 |              |
| % in repeats                   | 4.7               | 5.21                | 6.93                 | 7.5                  | 6.49               | 4.66                 |              |
| % in unclassified contigs      | 72.75             | 56.25               | 65.01                | 77.92                | 67.76              | 77.39                |              |
| SH: mixture vs. naïve          | -                 | -                   | -                    | -                    | 28970<br>(1.21%)   | -                    | (1.21%)      |
| % in genes                     |                   |                     |                      |                      | 9.69               |                      |              |
| % in transposons               |                   |                     |                      |                      | 11.84              |                      |              |
| % in repeats                   |                   |                     |                      |                      | 6.73               |                      |              |
| % in unclassified contigs      |                   |                     |                      |                      | 71.73              |                      |              |
| >> within monoculture assembly | -                 | 893 (0.13%)         | -                    | 1040 (0.19%)         | 18439<br>(0.77%)   | 14692 (0.68%)        | 0.44%        |
| % in genes                     |                   | 4.26                |                      | 7.69                 | 9.75               | 10.22                |              |
| % in transposons               |                   | 26.32               |                      | 9.71                 | 12.55              | 7.83                 |              |
| % in repeats                   |                   | 4.82                |                      | 5.1                  | 6.84               | 4.27                 |              |
| % in unclassified contigs      |                   | 64.61               |                      | 77.5                 | 70.87              | 77.68                |              |
| >> within mixture assembly     | 7012<br>(0.61%)   | -                   | 6574<br>(1.27%)      | -                    | 15019<br>(0.63%)   | -                    | 0.84%        |
| % in genes                     | 11.52             |                     | 12.64                |                      | 9.54               |                      |              |
| % in transposons               | 10.95             |                     | 16.06                |                      | 11.85              |                      |              |
| % in repeats                   | 4.08              |                     | 6.77                 |                      | 6.78               |                      |              |
| % in unclassified contigs      | 73.45             |                     | 64.53                |                      | 71.83              |                      |              |
| SH: monoculture vs. naïve      | -                 | -                   | -                    | -                    | 29052<br>(1.22%)   | -                    | (1.22%)      |
| % in genes                     |                   |                     |                      |                      | 9.25               |                      |              |
| % in transposons               |                   |                     |                      |                      | 12.52              |                      |              |
| % in repeats                   |                   |                     |                      |                      | 6.83               |                      |              |
| % in unclassified contigs      |                   |                     |                      |                      | 71.4               |                      |              |
| >> within monoculture assembly | -                 | 1388<br>(0.20%)     | -                    | 620 (0.11%)          | 15877<br>(0.67%)   | 13614 (0.63%)        | 0.40%        |
| % in genes                     |                   | 5.04                |                      | 6.29                 | 9.01               | 10.13                |              |

|                                             |              |             |              |             |               |              |         |
|---------------------------------------------|--------------|-------------|--------------|-------------|---------------|--------------|---------|
| % in transposons                            |              | 28.6        |              | 7.1         | 12.36         | 7.28         |         |
| % in repeats                                |              | 6.63        |              | 8.06        | 7.26          | 4.73         |         |
| % in unclassified contigs                   |              | 59.73       |              | 78.55       | 71.37         | 77.86        |         |
| >> within mixture assembly                  | 5336 (0.46%) | -           | 5464 (1.05%) | -           | 18419 (0.77%) | -            | 0.76%   |
| % in genes                                  | 10.91        |             | 11.79        |             | 9.98          |              |         |
| % in transposons                            | 9.07         |             | 15.98        |             | 12.24         |              |         |
| % in repeats                                | 3.77         |             | 6.9          |             | 6.59          |              |         |
| % in unclassified contigs                   | 76.26        |             | 65.34        |             | 71.19         |              |         |
| AS: mixture vs. monoculture                 | -            | -           | -            | -           | 937 (0.04%)   | -            | (0.04%) |
| % in genes                                  |              |             |              |             | 8             |              |         |
| % in transposons                            |              |             |              |             | 11.31         |              |         |
| % in repeats                                |              |             |              |             | 8.86          |              |         |
| % in unclassified contigs                   |              |             |              |             | 71.82         |              |         |
| >> within naïve selection history           | -            | -           | -            | -           | 2988 (0.13%)  | -            | (0.13%) |
| % in genes                                  |              |             |              |             | 9.64          |              |         |
| % in transposons                            |              |             |              |             | 14.63         |              |         |
| % in repeats                                |              |             |              |             | 7.83          |              |         |
| % in unclassified contigs                   |              |             |              |             | 67.9          |              |         |
| >> within monoculture selection history     | 948 (0.08%)  | 191 (0.03%) | 216 (0.04%)  | 506 (0.09%) | 2264 (0.09%)  | 1588 (0.07%) | 0.06%   |
| % in genes                                  | 9.07         | 7.85        | 8.8          | 10.87       | 7.91          | 5.79         |         |
| % in transposons                            | 10.34        | 31.94       | 18.52        | 6.92        | 14.31         | 12.22        |         |
| % in repeats                                | 5.38         | 3.14        | 3.7          | 11.86       | 7.99          | 6.11         |         |
| % in unclassified contigs                   | 75.21        | 57.07       | 68.98        | 70.36       | 69.79         | 75.88        |         |
| >> within mixture selection history         | 4032 (0.35%) | 708 (0.10%) | -            | 944 (0.17%) | 1857 (0.08%)  | 1624 (0.07%) | 0.15%   |
| % in genes                                  | 6.92         | 4.38        |              | 3.6         | 7.7           | 9.3          |         |
| % in transposons                            | 12.7         | 29.66       |              | 11.55       | 16.05         | 8.37         |         |
| % in repeats                                | 6.42         | 6.36        |              | 9           | 6.41          | 5.11         |         |
| % in unclassified contigs                   | 73.96        | 59.6        |              | 75.85       | 69.84         | 77.22        |         |
| Total (percentage DMCs of tested cytosines) | 21086 (1.8%) | 3291 (0.5%) | 16544 (3.2%) | 5122 (0.9%) | 65507 (2.7%)  | 36076 (1.7%) | 1.80%   |

870 AS = assembly, SH= selection history. For data on separate sequence contexts see

871 Tables S7 (CG), S8 (CHG), and S9 (CHH).

872
